# Supplementary material for: Pseudopolymorphism based on 1D metallacyclic chains constructed from an angular zwitterionic ditopic diacid organic linker
Source: Royal Society of Chemistry journal article supplement (doi:10.1039/c7ce01568b), 2017-01-01
Supplement: c7ce01568b1.pdf [file c7ce01568b1.pdf]

## **Pseudopolymorphism based on 1D metallacyclic chains constructed from angular zwitterionic ionic ditopic diacid organic linker**

Yong-Qing Huang,<sup>\*a</sup> Zong-Ge Li,<sup>a</sup> Huai-Ying Chen,<sup>a</sup> Hai-Di Cheng,<sup>a</sup> Yang Wang,<sup>a</sup> Yong-He Ren,<sup>a</sup> Yue Zhao,<sup>\*b</sup> and Li Liu<sup>c</sup>

<sup>a</sup>State Key Laboratory of Mining Disaster Prevention and Control Co-founded by Shandong Province and the Ministry of Science and Technology, Chemical and Environmental Engineering, Shandong University of Science and Technology, Qingdao 266590, China

<sup>b</sup>State Key Laboratory of Coordination Chemistry, School of Chemistry and Chemical engineering, Nanjing National Laboratory of Microstructures, Nanjing University, Nanjing 210093, China

<sup>c</sup>School of Petrochemical Engineering, Changzhou University, Changzhou 213164, China.

**Corresponding Author:**

**Dr. Yong-Qing Huang**

**Email: yqhuangskd@163.com**

**Table S1** Distances(Å) and angles (°) of hydrogen bonds for **1α** and **1β**<sup>a</sup>

| D-H...A                | Distance   |                      | Angle   |
|------------------------|------------|----------------------|---------|
|                        | (D...A)    | D-H-A                | (D-H-A) |
| <b>1α</b>              |            |                      |         |
| O(6W)-H(6WB)...O(4)#1  | 2.8252(7)  | O(6W)-H(6WB)-O(4)#1  | 174     |
| O(6W)-H(6WA)...O(3)    | 2.9476(3)  | O(6W)-H(6WA)-O(3)    | 167     |
| C(1)-H(1A)...O(6W)#2   | 3.1765(7)  | C(1)-H(1A)-O(6W)#2   | 153     |
| C(5)-H(5A)...O(2)#1    | 3.0076(7)  | C(5)-H(5A)-O(1)#1    | 128     |
| C(5)-H(5A)...O(1)#3    | 3.0194(7)  | C(5)-H(5A)-O(1)#3    | 134     |
| C(13)-H(13A)...O(6W)#2 | 3.4364(8)  | C(13)-H(13A)-O(6W)#2 | 152     |
| <b>1β</b>              |            |                      |         |
| O(1W)-H(1WA)...O(1)#4  | 2.8640(10) | O(1W)-H(1WA)-O(1)#4  | 176     |
| O(1W)-H(1WB)...O(4)    | 2.9771(11) | O(6W)-H(6WA)-O(3)    | 172     |
| C(9)-H(9A)...O(1W)#5   | 3.3955(12) | C(9)-H(9A)-O(1W)#5   | 157     |
| C(12)-H(12A)...O(4)#6  | 3.2950(12) | C(12)-H(12A)-O(4)#6  | 159     |
| C(13)-H(13A)...O(2)#7  | 3.1986(11) | C(13)-H(13A)-O(2)#7  | 167     |

<sup>a</sup> Symmetry transformations used to generate equivalent atoms: #1 1/4-x, 1/4+y, 1/4+z; #2 1/2-x, -y, -1/2+z; #3 1/4+x, -1/4-y, 1/4+z; #4; #5 x, 1-y, -1/2+z; #6 1/2-x, 3/2-y, 1/2-z; #7 -1/2+x, 1/2-y, z.

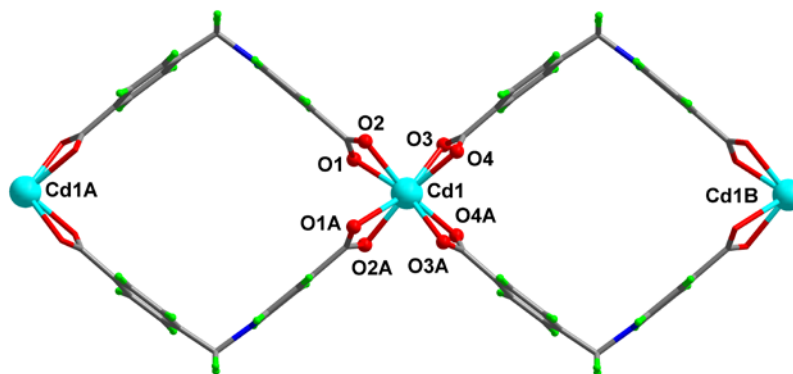**Fig. S1** Partial structure in **1α** and **1β** showing the coordination environment of Cd(II) ion.

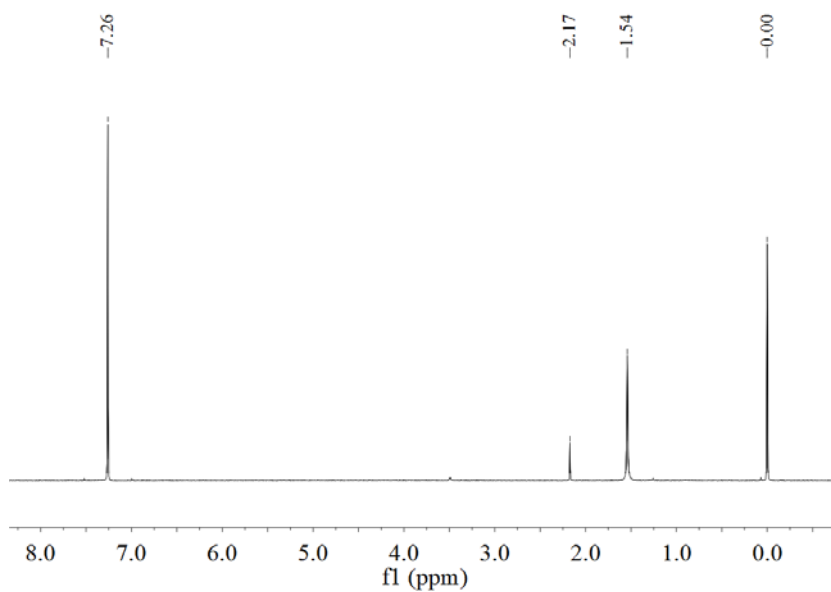

**Fig. S2** The  $^1\text{H}$  NMR spectrum of complex  $1\alpha$ .

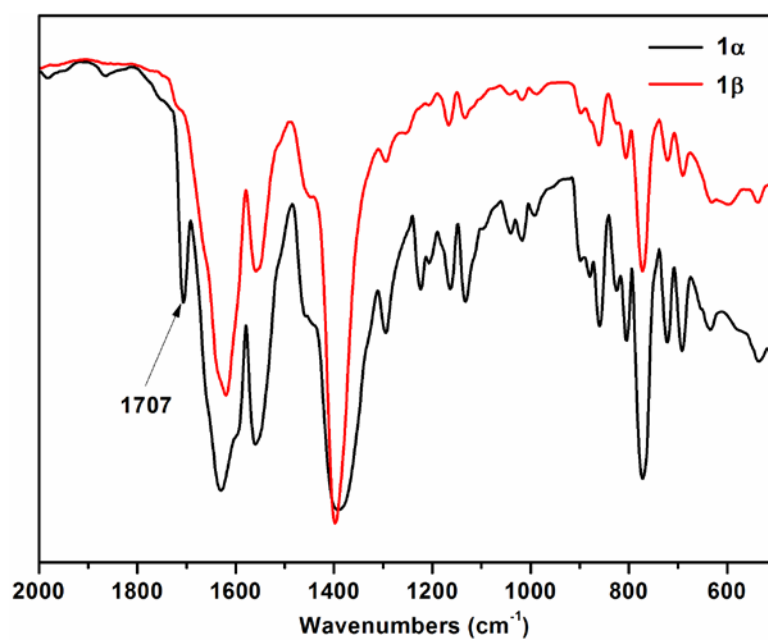

**Fig. S3.** The IR spectra of complexes  $1\alpha$  and  $1\beta$ .

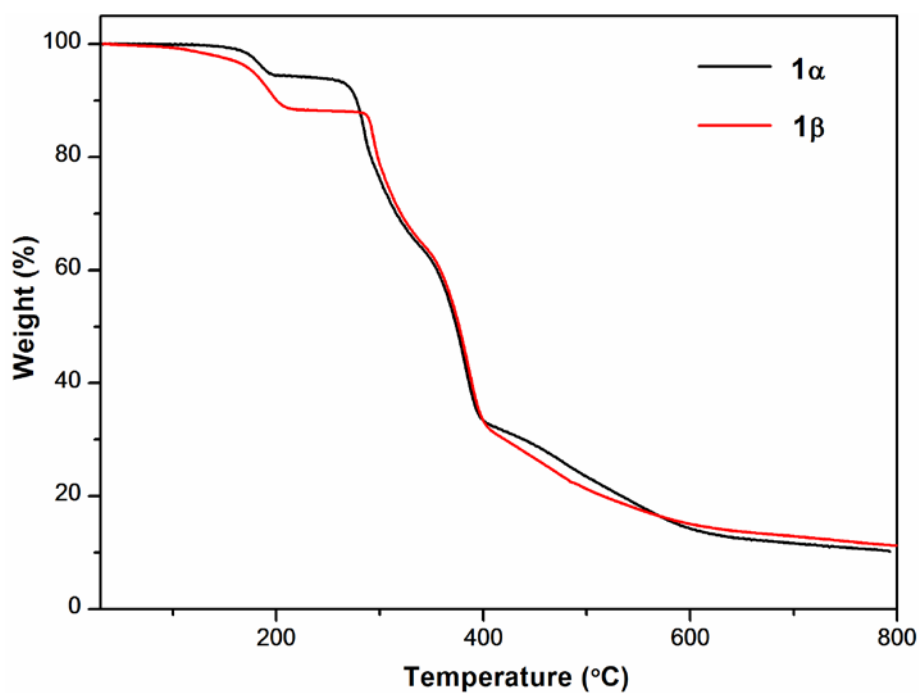

**Fig. S4** TGA plots of complexes **1 $\alpha$**  and **1 $\beta$**  under a N<sub>2</sub> atmosphere.

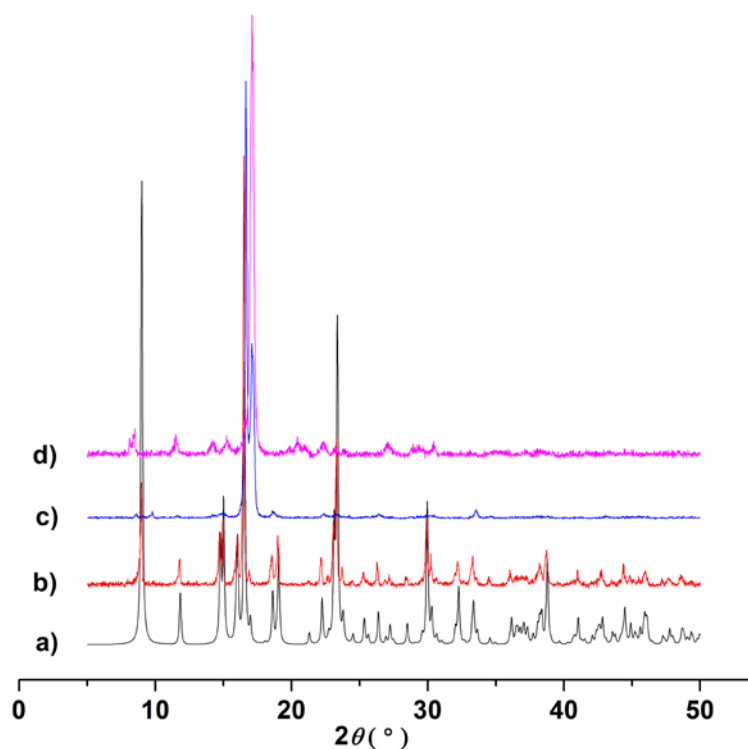

**Fig. S5** Powder X-ray diffraction (PXRD) pattern of complex **1 $\alpha$** . a): calculated from single crystal data; b): experimental; c) heated at 180 °C for 3 days; d) the desolvated **1 $\alpha$ '** were soaked in acetone for 3 days.

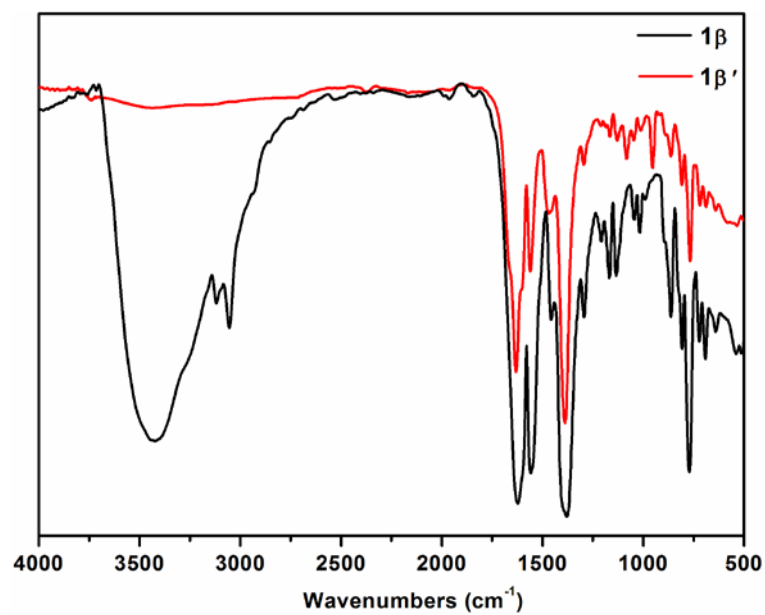

**Fig. S6** The IR spectra of complexes **1β** and **1β'**.

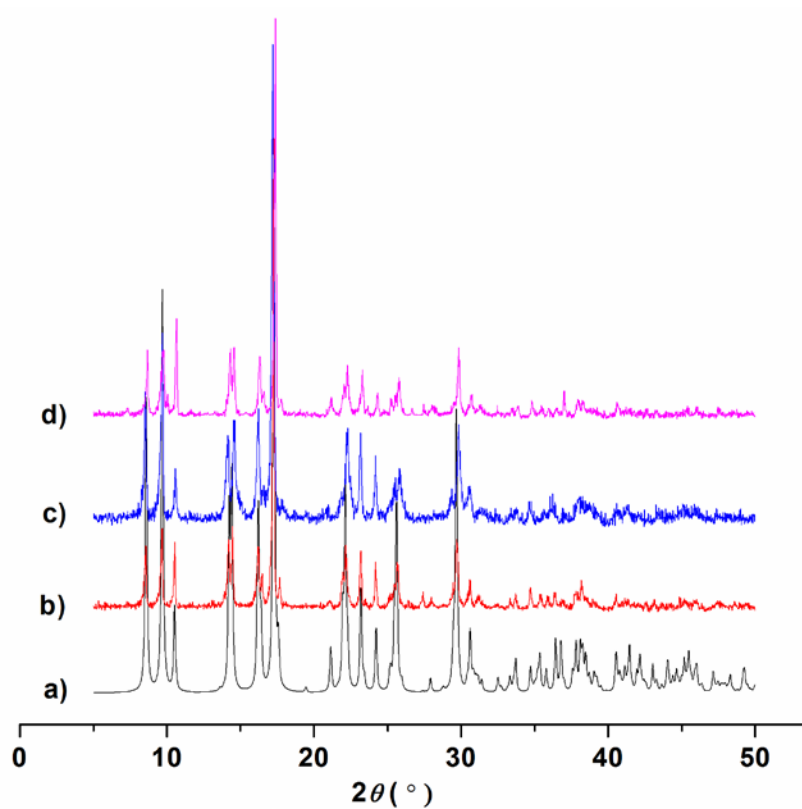

**Fig. S7** Powder X-ray diffraction (PXRD) pattern of complex **1β**. a): calculated from single crystal data; b): experimental; c) heated at 180 °C for 1 days; d) the desolvated **1β'** were soaked in water for 3 days.

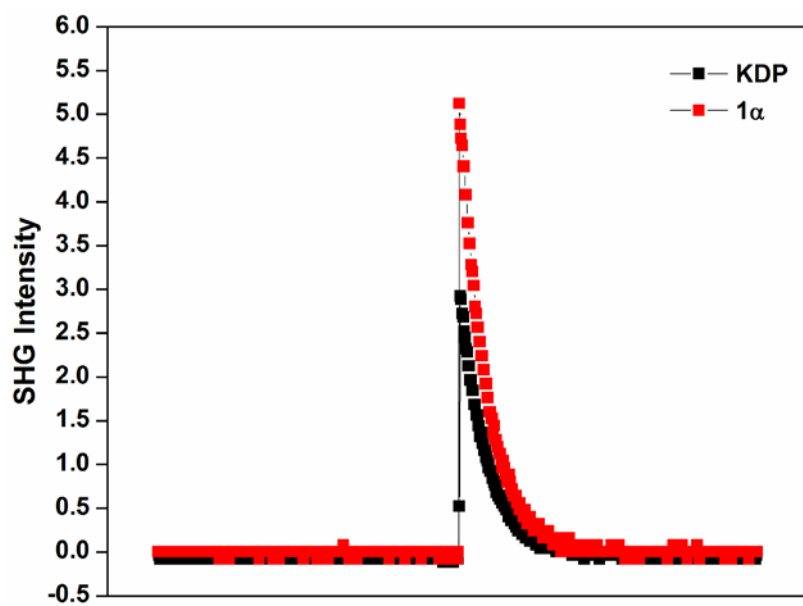

**Fig. S8** Curves of the measured SHG signals of KDP and complex **1α**.
